# Supplementary material for: Multivariate Analysis of Grain Yield and Its Attributing Traits in Different Maize Hybrids Grown under Heat and Drought Stress
Source: Hindawi journal article supplement (doi:10.1155/2015/563869), 2015-01-01
Supplement: f1 [file 563869.f1.pdf]

**Supplementary Tables**

(Suppl. Table S1). Mean Square values of Analysis of variance (Combined over both seasons) of yield and its attributing traits in maize [see section materials and methods for parental codes and traits description]

| SOV              |    | Ch.    | P.H     | S.D     | FLW     | L.A        | L.W      | FS.W     | LL     |
|------------------|----|--------|---------|---------|---------|------------|----------|----------|--------|
| Parents maturity | at | 11.71* | 286.57* | 0.004** | 6228**  | 24814.26** | 410.03** | 3559.1** | 0.21*  |
| F1 at maturity   |    | 23.38  | 548.85* | 0.009*  | 213.06* | 8646.4**   | 594.6**  | 4180.6** | 1.34** |

  

| SOV              |    | FLSWR  | A       | gs     | E       | L.T     | Ci        | nlp   | GY        |
|------------------|----|--------|---------|--------|---------|---------|-----------|-------|-----------|
| Parents maturity | at | 0.19*  | 177.3** | 0.04** | 44.3**  | 12.16*  | 16372.8** | 4.33* | 1191.1*   |
| F1 at maturity   |    | 0.23** | 80.13** | 0.013* | 8.012** | 33.08** | 2545.1**  | 1.29* | 14239.53* |

\* = Significance at (\*P < 0.05)

\*\*= Significance at (\*P < 0.01)

**(Suppl. Table S2).** Duncan Multiple Range Test (DMRT) for grain yield and its components of four parental lines [see section materials and methods for hybrids and traits description]

| Ch.C      |                     | P.H                   |                    | SD                    |                     | LA             |                      |
|-----------|---------------------|-----------------------|--------------------|-----------------------|---------------------|----------------|----------------------|
| µg/L      |                     | cm                    |                    | cm                    |                     | m <sup>2</sup> |                      |
| Genotypes | DMRT                | Genotypes             | DMRT               | Genotypes             | DMRT                | Genotypes      | DMRT                 |
| P4        | 45.82 <sup>A</sup>  | P4                    | 78.44 <sup>A</sup> | P4                    | 0.80 <sup>A</sup>   | P4             | 433.89 <sup>A</sup>  |
| P2        | 44.58 <sup>A</sup>  | P3                    | 76.69 <sup>A</sup> | P3                    | 0.73 <sup>B</sup>   | P3             | 420.16 <sup>A</sup>  |
| P3        | 43.70 <sup>AB</sup> | P1                    | 66.42 <sup>B</sup> | P2                    | 0.71 <sup>B</sup>   | P1             | 383.70 <sup>A</sup>  |
| P1        | 40.74 <sup>B</sup>  | P2                    | 63.04 <sup>C</sup> | P1                    | 0.56 <sup>C</sup>   | P2             | 278.21 <sup>B</sup>  |
| FSW       |                     | A                     |                    | gs                    |                     | E              |                      |
| g         |                     | µmol/m <sup>2</sup> s |                    | mmol/m <sup>2</sup> s |                     | mm/s           |                      |
| Genotypes | DMRT                | Genotypes             | DMRT               | Genotypes             | DMRT                | Genotypes      | DMRT                 |
| P4        | 139.68 <sup>A</sup> | P3                    | 23.73 <sup>A</sup> | P4                    | 0.32 <sup>A</sup>   | P2             | 14.13 <sup>A</sup>   |
| P3        | 96.78 <sup>B</sup>  | P4                    | 17.68 <sup>B</sup> | P2                    | 0.21 <sup>B</sup>   | P1             | 11.38 <sup>B</sup>   |
| P2        | 86.06 <sup>C</sup>  | P2                    | 17.68 <sup>B</sup> | P3                    | 0.14 <sup>C</sup>   | P3             | 8.24 <sup>C</sup>    |
| P1        | 81.04 <sup>C</sup>  | P1                    | 9.24 <sup>C</sup>  | P1                    | 0.11 <sup>C</sup>   | P4             | 7.75 <sup>C</sup>    |
| LT        |                     | SSC/Ci                |                    | Nlp                   |                     | FLW            |                      |
| °C        |                     | vpm                   |                    |                       |                     | g              |                      |
| Genotypes | DMRT                | Genotypes             | Genotypes          | Genotypes             | DMRT                | Genotypes      | DMRT                 |
| P1        | 48.02 <sup>A</sup>  | P4                    | P4                 | P4                    | 13.61 <sup>A</sup>  | P4             | 54.98 <sup>A</sup>   |
| P2        | 47.56 <sup>A</sup>  | P3                    | P3                 | P3                    | 12.82 <sup>AB</sup> | P3             | 46.90 <sup>B</sup>   |
| P3        | 47.28 <sup>A</sup>  | P1                    | P1                 | P1                    | 12.21 <sup>AB</sup> | P1             | 39.19 <sup>C</sup>   |
| P4        | 44.56 <sup>B</sup>  | P2                    | P2                 | P2                    | 11.42 <sup>B</sup>  | P2             | 34.31 <sup>C</sup>   |
| LL        |                     | LW                    |                    | FLSWR                 |                     | GY             |                      |
| Cm        |                     | Cm                    |                    |                       |                     | g              |                      |
| Genotypes | DMRT                | Genotypes             | DMRT               | Genotypes             | DMRT                | Genotypes      | DMRT                 |
| P4        | 67.10 <sup>A</sup>  | P4                    | 6.56               | P4                    | 2.54                | P4             | 837.60 <sup>A</sup>  |
| P3        | 66.68 <sup>AB</sup> | P3                    | 6.41               | P3                    | 2.41                | P3             | 812.00 <sup>AB</sup> |
| P1        | 58.61 <sup>BC</sup> | P1                    | 6.26               | P2                    | 2.20                | P2             | 654.20 <sup>BC</sup> |
| P2        | 52.12 <sup>C</sup>  | P2                    | 4.74               | P1                    | 2.01                | P1             | 568 <sup>D</sup>     |

Values in the same column with the same letter are not significantly different (\*P < 0.01).

**(Table S3).** Duncan Multiple Range Test (DMRT) for grain yield and yield attributing traits of twelve maize hybrids (combined over both seasons) [see section materials and methods for hybrids and traits description]

| CH.C    |                      | P.H     |                      | SD      |                   | LA             |                      |
|---------|----------------------|---------|----------------------|---------|-------------------|----------------|----------------------|
|         |                      | cm      |                      | cm      |                   | m <sup>2</sup> |                      |
| Hybrids | DMRT                 | Hybrids | DMRT                 | Hybrids | DMRT              | Hybrids        | DMRT                 |
| H12     | 56.633 <sup>A</sup>  | H12     | 255.97 <sup>A</sup>  | H12     | 0.71 <sup>A</sup> | H12            | 733.85 <sup>A</sup>  |
| H11     | 55.367 <sup>AB</sup> | H11     | 252.27 <sup>AB</sup> | H11     | 0.61 <sup>B</sup> | H7             | 729.91 <sup>A</sup>  |
| H9      | 55.233 <sup>AB</sup> | H10     | 249.63 <sup>AB</sup> | H10     | 0.60 <sup>B</sup> | H11            | 693.51 <sup>AB</sup> |

|         |                       |                    |                        |                                    |                       |                                  |                       |
|---------|-----------------------|--------------------|------------------------|------------------------------------|-----------------------|----------------------------------|-----------------------|
| H8      | 53.033 <sup>ABC</sup> | H9                 | 245.97 <sup>ABC</sup>  | H9                                 | 0.60 <sup>B</sup>     | H8                               | 658.87 <sup>ABC</sup> |
| H7      | 52.867 <sup>ABC</sup> | H7                 | 243.90 <sup>ABC</sup>  | H7                                 | 0.60 <sup>B</sup>     | H1                               | 648.56 <sup>ABC</sup> |
| H10     | 52.733 <sup>ABC</sup> | H3                 | 238.10 <sup>ABCD</sup> | H6                                 | 0.59 <sup>B</sup>     | H9                               | 647.60 <sup>ABC</sup> |
| H1      | 52.433 <sup>ABC</sup> | H2                 | 238.03 <sup>ABCD</sup> | H8                                 | 0.57 <sup>B</sup>     | H5                               | 640.16 <sup>ABC</sup> |
| H6      | 52.033 <sup>ABC</sup> | H4                 | 237.63 <sup>ABCD</sup> | H3                                 | 0.57 <sup>B</sup>     | H2                               | 627.79 <sup>BC</sup>  |
| H4      | 51.633 <sup>ABC</sup> | H8                 | 236.80 <sup>ABCD</sup> | H5                                 | 0.57 <sup>B</sup>     | H6                               | 626.76 <sup>BC</sup>  |
| H5      | 50.600 <sup>ABC</sup> | H6                 | 234.67 <sup>ABCD</sup> | H4                                 | 0.56 <sup>B</sup>     | H4                               | 621.93 <sup>BC</sup>  |
| H2      | 50.433 <sup>ABC</sup> | H5                 | 230.40 <sup>ABCD</sup> | H3                                 | 0.55 <sup>BC</sup>    | H2                               | 593.94 <sup>C</sup>   |
| H3      | 49.833 <sup>BC</sup>  | H2                 | 224.07 <sup>BCD</sup>  | H1                                 | 0.55 <sup>BC</sup>    | H3                               | 581.39 <sup>C</sup>   |
| FLW     |                       | FSW                |                        | A                                  |                       | gs                               |                       |
| G       |                       | g                  |                        | $\mu\text{mol}/\text{m}^2\text{s}$ |                       | $\text{mmol}/\text{m}^2\text{s}$ |                       |
| Hybrids | DMRT                  | Hybrids            | DMRT                   | Hybrids                            | DMRT                  | Hybrids                          | DMRT                  |
| H12     | 106.57 <sup>A</sup>   | H12                | 328.13 <sup>A</sup>    | H12                                | 27.23 <sup>A</sup>    | H12                              | 0.36 <sup>A</sup>     |
| H11     | 97.10 <sup>AB</sup>   | H11                | 244.33 <sup>B</sup>    | H11                                | 26.90 <sup>A</sup>    | H10                              | 0.35 <sup>A</sup>     |
| H8      | 89.27 <sup>ABC</sup>  | H10                | 244.30 <sup>B</sup>    | H8                                 | 26.60 <sup>A</sup>    | H11                              | 0.32 <sup>AB</sup>    |
| H7      | 88.90 <sup>ABC</sup>  | H8                 | 243.17 <sup>B</sup>    | H10                                | 25.70 <sup>AB</sup>   | H8                               | 0.30 <sup>ABC</sup>   |
| H10     | 83.73 <sup>ABC</sup>  | H7                 | 231.47 <sup>B</sup>    | H7                                 | 25.10 <sup>AB</sup>   | H6                               | 0.30 <sup>ABC</sup>   |
| H9      | 81.77 <sup>ABC</sup>  | H9                 | 215.70 <sup>B</sup>    | H6                                 | 24.70 <sup>ABC</sup>  | H7                               | 0.26 <sup>ABCD</sup>  |
| H6      | 80.90 <sup>ABC</sup>  | H5                 | 214.73 <sup>B</sup>    | H9                                 | 23.90 <sup>ABCD</sup> | H9                               | 0.23 <sup>ABCD</sup>  |
| H5      | 77.90 <sup>BC</sup>   | H2                 | 209.43 <sup>BC</sup>   | H5                                 | 19.73 <sup>BCDE</sup> | H5                               | 0.22 <sup>ABCD</sup>  |
| H2      | 73.70 <sup>BCD</sup>  | H6                 | 207.97 <sup>BC</sup>   | H2                                 | 19.30 <sup>BCDE</sup> | H1                               | 0.22 <sup>ABCD</sup>  |
| H1      | 72.37 <sup>BCD</sup>  | H1                 | 207.77 <sup>BC</sup>   | H1                                 | 18.65 <sup>CDE</sup>  | H3                               | 0.18 <sup>BCD</sup>   |
| H4      | 71.37 <sup>BCD</sup>  | H4                 | 198.87 <sup>BC</sup>   | H4                                 | 18.10 <sup>DE</sup>   | H2                               | 0.17 <sup>BCD</sup>   |
| H3      | 70.70 <sup>BCD</sup>  | H3                 | 197.70 <sup>BC</sup>   | H4                                 | 17.47 <sup>E</sup>    | H4                               | 0.16 <sup>BCD</sup>   |
| E       |                       | LT                 |                        | SSC/Ci                             |                       | nlp                              |                       |
| mm/s    |                       | $^{\circ}\text{C}$ |                        | vpm                                |                       |                                  |                       |
| Hybrids | DMRT                  | Hybrids            | DMRT                   | Hybrids                            | DMRT                  | Hybrids                          | DMRT                  |
| H6      | 13.90 <sup>A</sup>    | H9                 | 54.63 <sup>A</sup>     | H12                                | 266.33 <sup>A</sup>   | H12                              | 12.66 <sup>A</sup>    |
| H9      | 12.13 <sup>AB</sup>   | H1                 | 51.86 <sup>AB</sup>    | H11                                | 255.33 <sup>AB</sup>  | H11                              | 12.01 <sup>AB</sup>   |
| H7      | 11.93 <sup>AB</sup>   | H5                 | 50.36 <sup>ABC</sup>   | H1                                 | 249.67 <sup>AB</sup>  | H9                               | 12.01 <sup>AB</sup>   |
| H8      | 11.76 <sup>ABC</sup>  | H10                | 50.26 <sup>ABC</sup>   | H7                                 | 248.67 <sup>AB</sup>  | H10                              | 12.01 <sup>AB</sup>   |
| H10     | 11.73 <sup>ABC</sup>  | H7                 | 49.93 <sup>ABCD</sup>  | H8                                 | 223.33 <sup>ABC</sup> | H5                               | 11.66 <sup>ABC</sup>  |
| H5      | 11.46 <sup>ABCD</sup> | H8                 | 49.76 <sup>ABCDE</sup> | H9                                 | 216.00 <sup>ABC</sup> | H8                               | 11.66 <sup>ABC</sup>  |
| H2      | 11.40 <sup>ABCD</sup> | H4                 | 49.10 <sup>ABCDE</sup> | H6                                 | 213.00 <sup>ABC</sup> | H6                               | 11.66 <sup>ABC</sup>  |
| H4      | 10.95 <sup>BCDE</sup> | H6                 | 48.20 <sup>ABCDE</sup> | H10                                | 210.67 <sup>ABC</sup> | H4                               | 11.33 <sup>ABCD</sup> |
| H11     | 10.76 <sup>BCDE</sup> | H2                 | 47.40 <sup>BCDE</sup>  | H2                                 | 204.33 <sup>BC</sup>  | H7                               | 11.33 <sup>ABCD</sup> |
| H12     | 10.01 <sup>BCDE</sup> | H3                 | 45.96 <sup>BCDE</sup>  | H3                                 | 204.00 <sup>BC</sup>  | H2                               | 11.33 <sup>ABCD</sup> |
| H3      | 9.27 <sup>BCDE</sup>  | H11                | 45.76 <sup>BCDE</sup>  | H5                                 | 201.00 <sup>BC</sup>  | H1                               | 11.33 <sup>ABCD</sup> |
| H1      | 8.98 <sup>CDE</sup>   | H12                | 45.63 <sup>BCDE</sup>  | H4                                 | 197.33 <sup>BC</sup>  | H3                               | 11.01 <sup>BCD</sup>  |
| LW      |                       | LL                 |                        | FLSWR                              |                       | G.Y                              |                       |

| Cm      |          | Cm      |                       |         |                     | g       |                       |
|---------|----------|---------|-----------------------|---------|---------------------|---------|-----------------------|
| Hybrids | DMRT     | Hybrids | DMRT                  | Hybrids | DMRT                | Hybrids | DMRT                  |
| H12     | 8.96A    | H12     | 82.53 <sup>A</sup>    | H12     | 4.71 <sup>A</sup>   | H12     | 1768.7 <sup>A</sup>   |
| H11     | 8.93 A   | H11     | 80.10 <sup>AB</sup>   | H11     | 3.43 <sup>B</sup>   | H11     | 1581.7 <sup>AB</sup>  |
| H10     | 8.90A    | H10     | 78.00 <sup>B</sup>    | H10     | 3.58 <sup>B</sup>   | H10     | 1380.0 <sup>BC</sup>  |
| H6      | 8.63AB   | H6      | 78.80 <sup>B</sup>    | H8      | 3.43 <sup>B</sup>   | H7      | 1266.0 <sup>BC</sup>  |
| H8      | 8.63AB   | H8      | 77.13 <sup>BC</sup>   | H7      | 3.24 <sup>BC</sup>  | H6      | 1066.0 <sup>BCD</sup> |
| H9      | 8.56AB   | H9      | 77.47 <sup>BC</sup>   | H9      | 3.14 <sup>BC</sup>  | H9      | 991.0 <sup>BCD</sup>  |
| H4      | 8.50ABC  | H4      | 76.90 <sup>BCD</sup>  | H5      | 2.89 <sup>CD</sup>  | H5      | 958.7 <sup>BCD</sup>  |
| H1      | 8.46ABCD | H1      | 75.53 <sup>BCDE</sup> | H2      | 2.79 <sup>CD</sup>  | H8      | 874.0 <sup>BCD</sup>  |
| H7      | 8.46ABCD | H7      | 75.20 <sup>BCDE</sup> | H6      | 2.78 <sup>CD</sup>  | H2      | 840.0 <sup>BCD</sup>  |
| H3      | 8.43ABCD | H3      | 74.20 <sup>BCDE</sup> | H1      | 2.77 <sup>CD</sup>  | H4      | 768.7 <sup>BCD</sup>  |
| H4      | 7.93BCD  | H4      | 74.43 <sup>BCDE</sup> | H4      | 2.43 <sup>CDE</sup> | H3      | 767.0 <sup>BCD</sup>  |
| H2      | 7.83BCD  | H2      | 72.90 <sup>CDEF</sup> | H3      | 2.36 <sup>CDE</sup> | H1      | 748.3 <sup>BCD</sup>  |

Values in the same column with the same letter are not significantly different (\*P < 0.01)

**Suppl. Table S4.** Eigen vectors (loadings) of first three principal components of yield and yield attributing traits [ see section materials and methods for traits description ].

| Traits | PCA1   | PCA2   | PCA3   |
|--------|--------|--------|--------|
| Ch.c   | 0.951  | -0.118 | 0.005  |
| nlp    | 0.957  | -0.211 | 0.032  |
| PH     | 0.928  | 0.082  | -0.168 |
| SD     | 0.832  | 0.354  | 0.170  |
| FSW    | 0.653  | 0.422  | 0.603  |
| FLW    | 0.975  | -0.078 | 0.049  |
| FLSWR  | -0.809 | 0.341  | 0.392  |
| LL     | 0.490  | -0.729 | 0.403  |
| LW     | 0.922  | 0.164  | -0.097 |
| LA     | 0.935  | -0.117 | 0.056  |
| E      | -0.938 | 0.096  | 0.210  |
| LT     | 0.251  | 0.865  | -0.353 |
| A      | -0.912 | -0.016 | 0.038  |
| gs     | -0.920 | 0.150  | 0.028  |
| Ci     | 0.747  | -0.152 | -0.418 |
| GY     | 0.851  | 0.259  | 0.426  |

**Suppl. Table S5.** Principal factor matrix after rotated factor loadings for yield and yield attributing traits [ see section materials and methods for traits description ].

| Variables               | Factors  |          |          | Final<br>Estimates ( $h^2$ ) | Communality |
|-------------------------|----------|----------|----------|------------------------------|-------------|
|                         | Factor 1 | Factor 2 | Factor 3 |                              |             |
| Ch.c                    | -0.749   | -0.595   | -0.052   | 0.918                        |             |
| nlp                     | 0.818    | 0.480    | -0.250   | 0.962                        |             |
| PH                      | 0.824    | 0.454    | 0.104    | 0.895                        |             |
| SD                      | 0.502    | 0.751    | 0.175    | 0.847                        |             |
| FSW                     | 0.113    | 0.977    | 0.025    | 0.969                        |             |
| FLW                     | 0.790    | 0.560    | -0.146   | 0.959                        |             |
| FLSWR                   | -0.950   | -0.046   | 0.142    | 0.925                        |             |
| LL                      | 0.373    | 0.241    | -0.858   | 0.934                        |             |
| LW                      | 0.762    | 0.536    | 0.140    | 0.887                        |             |
| LA                      | 0.764    | 0.525    | -0.180   | 0.891                        |             |
| E                       | -0.899   | -0.353   | 0.029    | 0.934                        |             |
| LT                      | 0.171    | 0.281    | 0.910    | 0.935                        |             |
| A                       | 0.759    | -0.506   | 0.017    | 0.833                        |             |
| gs                      | 0.803    | -0.445   | 0.166    | 0.870                        |             |
| Ci                      | 0.866    | 0.075    | 0.039    | 0.756                        |             |
| Factor variance ratio % | 49.85    | 29.47    | 11.22    | 90.55                        |             |
